# Supplementary material
Source: PubMed Central journal article supplement (PMC4426420)
Supplement: pnas.1409853112.sapp.pdf [file pnas.1409853112.sapp.pdf]

# 1 Supplementary Information

## 2 1. Data

3 Since 1994, a large-scale ground inventory has been conducted on numerous permanent sample  
4 plots established on the forested areas across the boreal region of Alaska. Inventory crew  
5 collected size (DBH and percentage cover) and status of all the plant species including tree,  
6 shrub, herbaceous vascular, and non-vascular species on an annual basis (1). The Alaska boreal  
7 forest, the largest forest component of the Alaska landscape, is characteristic of some of the most  
8 severe climatic conditions in the world with short growing seasons. Soil parent materials vary  
9 greatly from alluvial, loess, glacial, and lacustrine deposits to various bedrock types, with  
10 discontinuous permafrost present throughout the region. The sample area, stretching over  
11 300,000 km<sup>2</sup> from Fairbanks, AK in the north to the Kenai Peninsula in the south and the  
12 International Boundary in the east (**Fig. S1**), represents a wide range of species composition and  
13 physiographic conditions. A set of permanent sample plots were used to capture the dynamics of  
14 283 coexisting plant species in the region (**Table S1**).

15 The fixed-size permanent sample plots, each square in shape and 0.04 ha in size, were re-  
16 measured with a 5-year interval. The attributes measured include diameter at breast height,  
17 height, tree status, the percentage cover of non-tree species, elevation, percentage slope,  
18 thickness of organic horizons, and number of snags. The number of *Picea glauca* individuals in  
19 comparative relationship to the total number of trees on a plot was calculated to represent the  
20 sampling effect, as *Picea glauca* has the highest individual ANPP among all the tree species that  
21 almost doubles the second highest species (*Betula neoalaskana*) (**Fig. S2**). In addition, two time  
22 indicators ( $T_1, T_2$ ) were introduced to represent from which inventory a particular observation  
23 was made. From the 603 established permanent sample plots, 440 were selected for this study  
24 because they have been measured at least twice and have not experienced any crown fire or  
25 logging between two consecutive inventories.

26 For individual trees, we calculated the above-ground net primary productivity (ANPP) using the  
27 following equation:

$$28 \quad ANPP_{ijk} = (V_{2,ijk} - V_{1,ijk}) / (y_2 - y_1), \quad (\text{M.1})$$

29 where the ANPP of the  $k$ th tree in species  $i$  on plot  $j$  is average annual increment in above-  
30 ground biomass (AGB) of that tree from year  $y_1$  to  $y_2$ .  $V_1$  and  $V_2$  represent AGB of that tree at  
31 year  $y_1$  and  $y_2$ , respectively, calculated from its measured DBH using the species-specific  
32 biomass equations developed for the Alaska boreal forest(2). ANPP is zero for a tree that died  
33 between year  $y_1$  and  $y_2$ . ANPP is the part of NPP that occurs aboveground and is composed of  
34 wood and foliage productivity, whereas root growth represents belowground productivity, which  
35 is extremely difficult to measure and contributes to ecosystem services, such as carbon storage,  
36 but not to harvested fiber. ANPP of trees was selected as the response variable of our spatio-

1 temporal model, as it is more routinely measured and represents wood production, a surrogate for  
2 economically important fiber production.

3 The total tree ANPP of a community (*TNPP*) was then calculated using the following equation:

$$4 \quad TNPP_j = \left( \sum_i \sum_k V_{2,j} - \sum_i \sum_k V_{1,j} + \sum_i \sum_k IG_j + \sum_i \sum_k MT_j \right) / (y_2 - y_1), \quad (M.2)$$

5 where  $\sum \sum V_{2,j}$  and  $\sum \sum V_{1,j}$  represent total AGB of trees on plot  $j$  that were alive at year  $y_2$  and  $y_1$ ,  
6 and  $\sum \sum IG_j$  and  $\sum \sum MT_j$  are respectively total AGB of ingrowth and mortality on plot  $j$  between  
7 year  $y_1$  and  $y_2$ .

8 The AGB of shrub, herbaceous vascular, and non-vascular species was calculated based on the  
9 observed percentage cover and average height of that species using the species-specific biomass  
10 equations calibrated for interior Alaska(3). On average, tree species accounts for most of the total  
11 AGB, whereas shrub, herbaceous vascular, and non-vascular species accounts for less than 10  
12 percent of the total AGB (**Fig. S3**).

13 In our empirical analysis, the authors relied upon two *measures of biodiversity*, which are widely  
14 used in both ecological and economic research:

15 – Shannon index,  $H$ , which measures biodiversity with an entropic approach:

$$16 \quad H_j = - \sum_{i=1}^n \frac{V_{ij}}{V_j} \ln \left( \frac{V_{ij}}{V_j} \right), \quad (M.3)$$

17 where  $V_{ij}$  presents the live aboveground biomass of species  $i$  on plot  $j$ , and  $V_j$  the total live  
18 aboveground biomass of Plot  $j$ .

19 – Simpson index,  $D$ . The same index known as the Herfindahl-Hirschman index (HHI) is a  
20 measure of diversity widely used in competition law, antitrust, and management:

$$21 \quad D_j = 1 - \sum_{i=1}^n \left( \frac{V_{ij}}{V_j} \right)^2. \quad (M.4)$$

## 22 **2. The Spatio-Temporal Model**

23 In investigating the empirical relationship between biodiversity and ANPP, the authors elected to  
24 develop a regression-based spatio-temporal model to account for spatial autocorrelation which  
25 has been found prevalent in attributes of the Alaska boreal forest, such as stand basal area, tree  
26 diversity, and forest productivity (4). Failing to account for such correlation in space will render  
27 model outputs less reliable (5). Although an alternate statistical approach, namely structural  
28 equation modeling (SEM), has been employed in ecology for the testing of causal relationship in  
29 complex datasets, spatial autocorrelation violates basic SEM assumptions and remains difficult  
30 to model in a SEM framework (6). Furthermore, computational constraints of existing SEM

1 software have limited applicability of SEM on this study because our dataset consisted of tree  
2 records from 40,526 spatially explicit locations.

3 Autocorrelation in both space and time were accounted for in our model to avoid biased or  
4 inconsistent coefficient estimates and significance levels. Spatial autocorrelation in above-  
5 ground net primary productivity was estimated using a nonparametric spatial covariance function.  
6 This method incorporates a smoothing spline to measure the correlation between values (in our  
7 case ANPP) from pairs of samples over a continuous function of the distance separating samples,  
8 without assuming any functional form *a priori*. However, because of the large size (over 40,000  
9 entries) of our spatially explicit dataset, it was not feasible to estimate spatial autocorrelation  
10 based upon the entire dataset due to computational constraints. To this end, a bootstrap  
11 approach(7) was used to quantify the spatial covariance function. We iteratively and randomly  
12 selected approximately 10% of the data, and then repeated this procedure 500 times. From this  
13 distribution of 500 replicated estimates of the spatial covariance function, the mean was  
14 determined and 95% confidence intervals were estimated as the 0.025% and 0.975% quantiles of  
15 the distribution(7).

16 Across the 500 replications, the mean number of sampling locations selected (from the 40,526  
17 locations) per iteration was 4056, and ranged from 3838 to 4216. The authors detected spatial  
18 correlation in ANPP (**Fig. S4**), and estimated a mean local spatial autocorrelation (the correlation  
19 as the spatial distance between pairs of sample ANPP values approaches 0) of 0.09 and a range  
20 of spatial dependence (the lag distance at which spatial autocorrelation approaches 0) of ~10 km.  
21 Moreover, the functional form of the spatial covariance function over lag distance suggested that  
22 the use of spherical model would be the most appropriate one to use as an error term when  
23 assessing the significance of potential explanatory variables on ANPP.

24 To avoid compromised type-I error rates and severe artifacts associated with common model  
25 selection procedures, hierarchical partitioning (HP) was used here to evaluate the goodness-of-fit  
26 of all the possible combinations of explanatory variables in determining the average independent  
27 contribution of each variable(8). The threshold value of independent contribution was set at 8  
28 percent, the average value with 12 explanatory variables (**Table S2**). Diversity variables and  
29 time indicators were always present in the model, regardless of their independent contribution.  
30 HP was conducted with the hier.part package of the R program. Total aboveground biomass,  $V$ ,  
31 the number of snags,  $S$ , and the frequency of *Picea glauca*,  $P$ , were selected as control variables  
32 as each of them has an independent contribution to the individual ANPP no less than 8 percent  
33 (**Fig. S5**). Biodiversity  $\omega(\mathbf{s})$  was represented in this model by the full quadratic forms of Shannon  
34 index,  $H$ , and Simpson index,  $D$ , both of which provide a continuous measure of biodiversity.

35 The following spatio-temporal model was developed to examine the effect of biodiversity on  
36 individual plant productivity (ANPP model):

$$37 \quad ANPP_{ijk}(\mathbf{s}, \omega) = \alpha_0 + \alpha_1 \cdot \omega(\mathbf{s}) + \alpha_2 \cdot T_1(\mathbf{s}) + \alpha_3 \cdot T_2(\mathbf{s}) + \boldsymbol{\beta} \cdot \mathbf{z}(\mathbf{s}) + \varepsilon_i(\mathbf{s}), \quad (\text{M.5})$$

1 where  $\mathbf{s} = (\lambda, \varphi)' \in \mathcal{D} \subset \mathbb{R}^2$  represents the geographic location of a plot  $j$  within the Alaska  
2 boreal region  $\mathcal{D}$ . In this specification, individual ANPP at geographic location  $\mathbf{s}$  is a linear  
3 function of the biodiversity of the same plot, the temporal indicators  $T_1$  and  $T_2$ , and the vector of  
4 control variables  $\mathbf{z}$ .  $\varepsilon_i(\mathbf{s})$  is a spatially autocorrelated residual term best described as a spherical  
5 variogram  $2\zeta$  model with intrinsic stationarity and isotropic covariance.  $\alpha_0, \alpha_1, \alpha_2, \alpha_3, \boldsymbol{\beta}$ , and  $\zeta$  are  
6 parameters to be estimated with generalized least squares (GLS). The two time indicators ( $T_1, T_2$ )  
7 were introduced to the model to account for potential factors of ANPP that are not controlled for  
8 by the explanatory variables in this model, such as the temporal difference in sample plot  
9 locations.

10 Due to computational constraints, a bootstrap approach was used to obtain model coefficients  
11 and predicts. The authors iteratively and randomly selected approximately 1% of the data from  
12 the entire dataset, obtained GLS estimates, log-likelihood, and predictions across the full  
13 observed range of each biodiversity measure for the sensitivity analysis, and then repeated this  
14 procedure 1,000 times. From the distribution of 1,000 replicated estimates and predicts of the  
15 model, the mean and 95% confidence intervals were determined.

16 Estimates and goodness-of-fit of the spatio-temporal model are summarized in **Table S3**. All the  
17 coefficients are significant at the 5 percent level. The signs of total aboveground biomass,  $V$ , and  
18 the frequency of *Picea glauca*,  $P$ , are consistently positive, indicating an expected positive effect  
19 of total biomass and sampling effect on individual tree ANPP. The negative signs of the number  
20 of snags,  $S$ , and the two temporal indicators  $T_1$  and  $T_2$  are also consistent. The two goodness-of-  
21 fit measures Akaike information criterion (AIC) and Bayesian information criterion (BIC) were  
22 calculated based on the average log-likelihood values of all the bootstrap iterations, the number  
23 of coefficients, and the total number of observations. The present spatio-temporal models were  
24 able to capture an interaction in space and time, as the negative coefficients of  $T_1$  and  $T_2$  indicate  
25 a declining trend of ANPP over time, which is likely caused by the fact that most plots in the  
26 third and fourth inventories are centered around Fairbanks, AK, where the sites are in general  
27 less productive.

28

## 29 **SI REFERENCES**

- 30 1. Malone T, Liang J, & Packee. EC (2009) Cooperative Alaska Forest Inventory. (Gen.  
31 Tech. Rep. PNW-GTR-785, USDA Forest Service, Pacific Northwest Research Station,  
32 Portland, OR), p 42.
- 33 2. Yarie J, Kane ES, & Mack MC (2007) Aboveground biomass equations for trees of  
34 Interior Alaska. (Agricultural and Forestry Experiment Station, University of Alaska  
35 Fairbanks, Fairbanks, AK), p 15.
- 36 3. Mack M, *et al.* (2008) Recovery of Aboveground Plant Biomass and Productivity After  
37 Fire in Mesic and Dry Black Spruce Forests of Interior Alaska. *Ecosystems* 11(2):209-  
38 225.

- 1 4. Liang J (2012) Mapping large-scale forest dynamics: a geospatial approach. *Landscape*  
2 *Ecol.* 27(8):1091-1108.
- 3 5. Legendre P (1993) Spatial autocorrelation: trouble or new paradigm? *Ecology*  
4 74(6):1659-1673.
- 5 6. Lamb EG, Mengersen KL, Stewart KJ, Attanayake U, & Siciliano SD (2014) Spatially  
6 explicit structural equation modeling. *Ecology* 95(9):2434-2442.
- 7 7. Efron B & Tibshirani RJ (1993) *An Introduction to the Bootstrap* (Chapman & Hall, New  
8 York) p 436.
- 9 8. Chevan A & Sutherland M (1991) Hierarchical partitioning. *Amer. Statistician* 45:90-96.

10

11

12

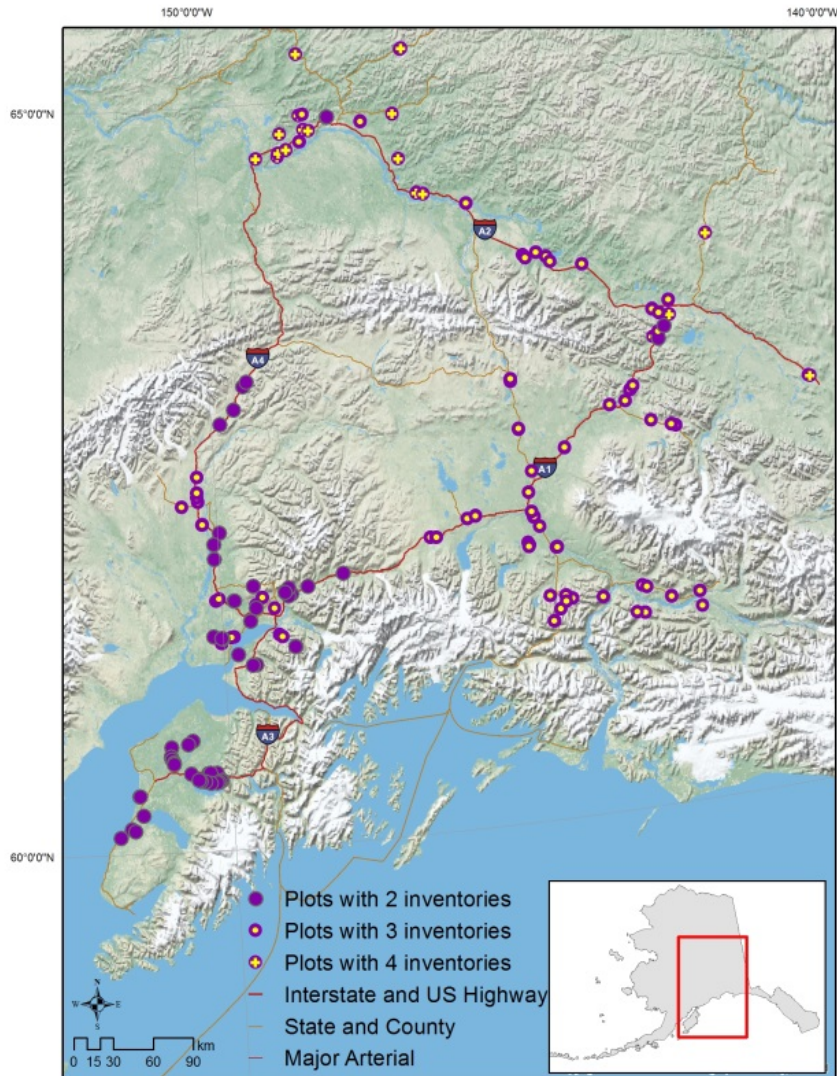

2 **Fig. S1 Geographic distribution of the 440 permanent sample plots and their relative**  
 3 **location within the State of Alaska (inset).** All the plots have been measured at least twice with  
 4 an interval of 5 years, 280 have been measured in 3 inventories, and 65 in 4 inventories, making  
 5 a total of 785 plot observations.

6

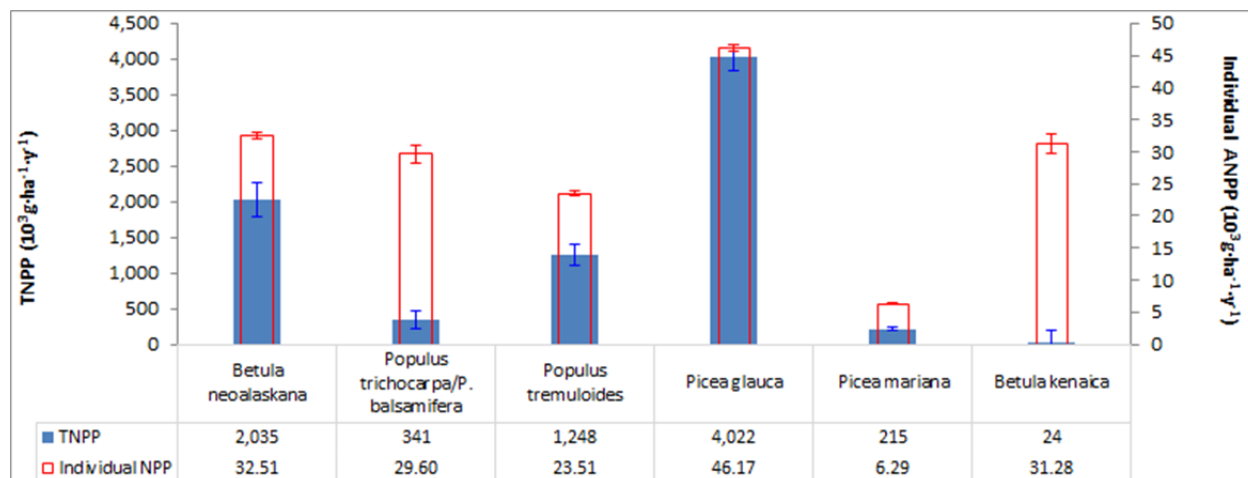

1

2 **Fig. S2 Total net primary productivity (TNPP) (primary axis) and average individual**  
 3 **ANPP (secondary axis) by tree species with standard error bars.**

4

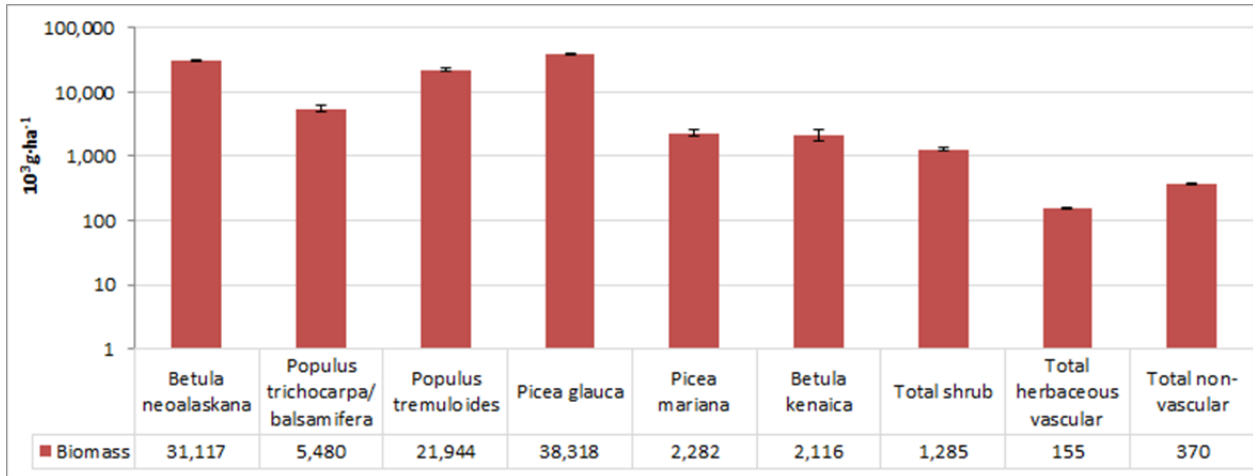

1

2 **Fig. S3 Total above-ground biomass (AGB) by species and plant type with standard error**  
 3 **bars.**

4



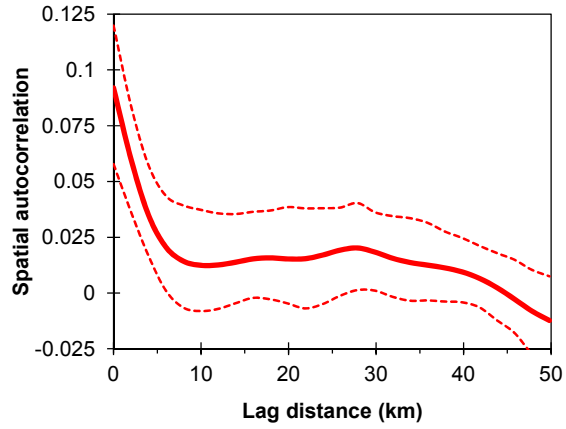

1  
2 **Fig. S4 Mean (solid line) and 95% confidence intervals (dashed lines) of the nonparametric**  
3 **spatial covariance function**, showing local spatial autocorrelation in values of above-ground net  
4 primary productivity, and a range of spatial dependence of ~10 km.

5

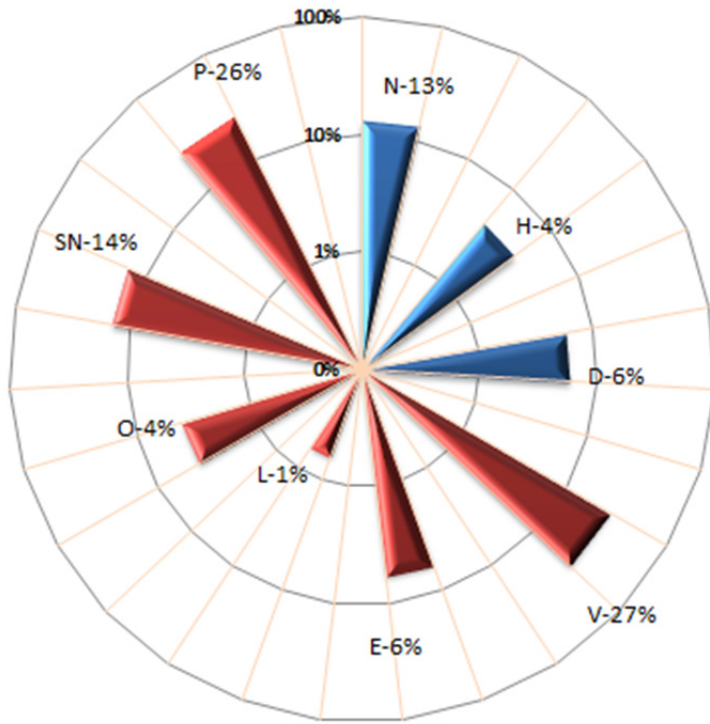

1

2 **Fig. S5 Independent contribution of biodiversity measures (blue wedges) and control**  
 3 **variables (red wedges) to the goodness-of-fit of individual ANPP.**

4

1 **Table S1 | List of plant species.** A total of 283 coexisting plant species studied in this paper are  
 2 categorized into nine general functional groups—tree, shrub, forb, grass and rush, sedge, fern,  
 3 lichen, moss, and liverwort.

| Tree                     |                                  |    |                                 |     |                                 |
|--------------------------|----------------------------------|----|---------------------------------|-----|---------------------------------|
| 1                        | <i>Betula kenaica</i>            | 5  | <i>Larix laricina</i>           | 9   | <i>Populus trichocarpa</i>      |
| 2                        | <i>Betula neoalaskana</i>        | 6  | <i>Picea mariana</i>            | 10  | <i>Tsuga mertensiana</i>        |
| 3                        | <i>Betula papyrifera</i>         | 7  | <i>Populus tremuloides</i>      | 11  | <i>Picea lutz</i>               |
| 4                        | <i>Picea glauca</i>              | 8  | <i>Populus balsamifera</i>      |     |                                 |
| Shrub                    |                                  |    |                                 |     |                                 |
| 1                        | <i>Alnus tenuifolia</i>          | 19 | <i>Ledum palustre</i>           | 37  | <i>Salix arctica</i>            |
| 2                        | <i>Alnus viridis (crispa)</i>    | 20 | <i>Linnaea borealis</i>         | 38  | <i>Salix bebbiana</i>           |
| 3                        | <i>Amelanchier alnifolia</i>     | 21 | <i>Menziesia ferruginea</i>     | 39  | <i>Salix myrtilifolia</i>       |
| 4                        | <i>Andromeda polifolia</i>       | 22 | <i>Oplopanax horridus</i>       | 40  | <i>Salix phylicifolia</i>       |
| 5                        | <i>Arctostaphylos rubra</i>      | 23 | <i>Oxycoccus microcarpus</i>    | 41  | <i>Salix pulchra</i>            |
| 6                        | <i>Arctostaphylos uva-ursi</i>   | 24 | <i>Potentilla fruticosa</i>     | 42  | <i>Salix reticulata</i>         |
| 7                        | <i>Betula glandulosa</i>         | 25 | <i>Potentilla palustris</i>     | 43  | <i>Salix species</i>            |
| 8                        | <i>Betula nana</i>               | 26 | <i>Rhododendron lapponicum</i>  | 44  | <i>Sambucus racemosa</i>        |
| 9                        | <i>Cassiope tetragona</i>        | 27 | <i>Ribes glandulosom</i>        | 45  | <i>Shepherdia canadensis</i>    |
| 10                       | <i>Chamaedaphne calyculata</i>   | 28 | <i>Ribes hudsonianum</i>        | 46  | <i>Sorbus scopulina</i>         |
| 11                       | <i>Dryas integrifolia</i>        | 29 | <i>Ribes lacustre</i>           | 47  | <i>Spiraea Beauverdiana</i>     |
| 12                       | <i>Dryas octopetala</i>          | 30 | <i>Ribes triste</i>             | 48  | <i>Vaccinium caespitosum</i>    |
| 13                       | <i>Empetrum nigrum</i>           | 31 | <i>Rosa acicularis</i>          | 49  | <i>Vaccinium ovalifolium</i>    |
| 14                       | <i>Juniperus horizontalis</i>    | 32 | <i>Rosa nutkana</i>             | 50  | <i>Vaccinium oxycoccus</i>      |
| 15                       | <i>Juniperus scopulorum</i>      | 33 | <i>Rubus arcticus</i>           | 51  | <i>Vaccinium uliginosum</i>     |
| 16                       | <i>Juniperus communis</i>        | 34 | <i>Rubus chamaemorus</i>        | 52  | <i>Vaccinium vitis-idaea</i>    |
| 17                       | <i>Ledum glandulosum</i>         | 35 | <i>Rubus idaeus</i>             | 53  | <i>Viburnum edule</i>           |
| 18                       | <i>Ledum groenlandicum</i>       | 36 | <i>Rubus pedatus</i>            |     |                                 |
| Herbaceous Vascular—Forb |                                  |    |                                 |     |                                 |
| 1                        | <i>Achillea borealis</i>         | 41 | <i>Equisetum arvense</i>        | 81  | <i>Polygonum alaskanum</i>      |
| 2                        | <i>Aconitum delphinifolium</i>   | 42 | <i>Equisetum pratense</i>       | 82  | <i>Polemonium boreale</i>       |
| 3                        | <i>Actaea rubra</i>              | 43 | <i>Equisetum scirpoides</i>     | 83  | <i>Polemonium pulcherrimum</i>  |
| 4                        | <i>Allium schoenoprasum</i>      | 44 | <i>Equisetum sylvaticum</i>     | 84  | <i>Polygonum viviparum</i>      |
| 5                        | <i>Anemone canadensis</i>        | 45 | <i>Fragaria virginiana</i>      | 85  | <i>Primula incana</i>           |
| 6                        | <i>Anemone multifida</i>         | 46 | <i>Galium boreale</i>           | 86  | <i>Primula tschuktschorum</i>   |
| 7                        | <i>Anemone parviflora</i>        | 47 | <i>Galium triflorum</i>         | 87  | <i>Pulsatilla patens</i>        |
| 8                        | <i>Anemone richardsonii</i>      | 48 | <i>Gentiana propinqua</i>       | 88  | <i>Pyrola asarifolia</i>        |
| 9                        | <i>Angelica lucida</i>           | 49 | <i>Geocaulon lividum</i>        | 89  | <i>Pyrola chlorantha</i>        |
| 10                       | <i>Antennaria pulcherrima</i>    | 50 | <i>Geranium erianthum</i>       | 90  | <i>Pyrola grandiflora</i>       |
| 11                       | <i>Arabis holboellii</i>         | 51 | <i>Goodyera repens</i>          | 91  | <i>Pyrola minor</i>             |
| 12                       | <i>Arnica alpina</i>             | 52 | <i>Hedysarum alpinum</i>        | 92  | <i>Ranunculus gmelini</i>       |
| 13                       | <i>Arnica Lessingii</i>          | 53 | <i>Heracleum lanatum</i>        | 93  | <i>Ranunculus lapponicus</i>    |
| 14                       | <i>Artemisia Tilesii</i>         | 54 | <i>Hieracium triste</i>         | 94  | <i>Ranunculus nivalis</i>       |
| 15                       | <i>Aster alpinus</i>             | 55 | <i>Iris setosa</i>              | 95  | <i>Ranunculus reptans</i>       |
| 16                       | <i>Astragalus americanus</i>     | 56 | <i>Lathyrus palustris</i>       | 96  | <i>Rumex arcticus</i>           |
| 17                       | <i>Aster junciformis</i>         | 57 | <i>Listera cordata</i>          | 97  | <i>Sanguisorba officinalis</i>  |
| 18                       | <i>Aster sibiricus</i>           | 58 | <i>Lupinus arcticus</i>         | 98  | <i>Sanguisorba stipulata</i>    |
| 19                       | <i>Astragalus umbellatus</i>     | 59 | <i>Lycopodium alpinum</i>       | 99  | <i>Saussurea angustifolia</i>   |
| 20                       | <i>Boschniakia rossica</i>       | 60 | <i>Lycopodium annotinum</i>     | 100 | <i>Senecio lugens</i>           |
| 21                       | <i>Boykinia richardsonii</i>     | 61 | <i>Lycopodium clavatum</i>      | 101 | <i>Senecio triangaris</i>       |
| 22                       | <i>Bupleurum triradiatum</i>     | 62 | <i>Lycopodium complanatum</i>   | 102 | <i>Senecio vulgaris</i>         |
| 23                       | <i>Calypso bulbosa</i>           | 63 | <i>Mertensia paniculata</i>     | 103 | <i>Smilacina stellata</i>       |
| 24                       | <i>Campanula lasiocarpa</i>      | 64 | <i>Mimulus guttatus</i>         | 104 | <i>Solidago decumbens</i>       |
| 25                       | <i>Campanula rotundifolia</i>    | 65 | <i>Moehringia lateriflora</i>   | 105 | <i>Solidago multiradiata</i>    |
| 26                       | <i>Castilleja caudata</i>        | 66 | <i>Moneses uniflora</i>         | 106 | <i>Spiranthes Romanzoffiana</i> |
| 27                       | <i>Cassiope tetragona</i>        | 67 | <i>Orthilia secunda</i>         | 107 | <i>Stellaria crassifolia</i>    |
| 28                       | <i>Castilleja unalaschcensis</i> | 68 | <i>Osmorhiza depauperata</i>    | 108 | <i>Stellaria longifolia</i>     |
| 29                       | <i>Chamerion angustifolium</i>   | 69 | <i>Oxytropis campestris</i>     | 109 | <i>Stellaria media</i>          |
| 30                       | <i>Circaea alpina</i>            | 70 | <i>Parnassia palustris</i>      | 110 | <i>Streptopus amplexifolius</i> |
| 31                       | <i>Cnidium cnidiifolium</i>      | 71 | <i>Pedicularis capitata</i>     | 111 | <i>Taraxacum officinale</i>     |
| 32                       | <i>Corydalis aurea</i>           | 72 | <i>Pedicularis labradorica</i>  | 112 | <i>Thalictrum alpinum</i>       |
| 33                       | <i>Corydalis pauciflora</i>      | 73 | <i>Pedicularis Langsdorffii</i> | 113 | <i>Thalictrum sparsiflorum</i>  |
| 34                       | <i>Cornus canadensis</i>         | 74 | <i>Pedicularis verticillata</i> | 114 | <i>Trientalis europaea</i>      |
| 35                       | <i>Corallorrhiza trifida</i>     | 75 | <i>Petasites frigidus</i>       | 115 | <i>Valeriana capitata</i>       |
| 36                       | <i>Cypripedium passerinum</i>    | 76 | <i>Petasites hyperboreus</i>    | 116 | <i>Veratrum viride</i>          |
| 37                       | <i>Delphinium brachycentrum</i>  | 77 | <i>Petasites sagittatus</i>     | 117 | <i>Viola epipsila</i>           |
| 38                       | <i>Delphinium glaucum</i>        | 78 | <i>Platanthera hyperborea</i>   | 118 | <i>Viola palustris</i>          |
| 39                       | <i>Dodecatheon frigidum</i>      | 79 | <i>Platanthera obtusata</i>     | 119 | <i>Zygadenus elegans</i>        |

|                                    |                                 |    |                                 |    |                                  |
|------------------------------------|---------------------------------|----|---------------------------------|----|----------------------------------|
| 40                                 | <i>Drosera rotundifolia</i>     | 80 | <i>Polemonium acutiflorum</i>   |    |                                  |
| Herbaceous Vascular—Grass and Rush |                                 |    |                                 |    |                                  |
| 1                                  | <i>Calamagrostis canadensis</i> | 5  | <i>Parnassia palustris</i>      | 9  | <i>Poa palustris</i>             |
| 2                                  | <i>Elymus</i> species           | 6  | <i>Poa arctica</i>              | 10 | <i>Poa</i> species               |
| 3                                  | <i>Festuca altaica</i>          | 7  | <i>Poa glauca</i>               | 11 | unknown grass                    |
| 4                                  | <i>Oryzopsis asperifolia</i>    | 8  | <i>Poa juncifolia</i>           | 12 | Juncaceae species                |
| Herbaceous Vascular—Sedge          |                                 |    |                                 |    |                                  |
| 1                                  | <i>Carex glacialis</i>          | 3  | <i>Eriophorum angustifolium</i> | 5  | unknown sedge                    |
| 2                                  | <i>Carex</i> species            | 4  | <i>Eriophorum</i> species       |    |                                  |
| Herbaceous Vascular—Fern           |                                 |    |                                 |    |                                  |
| 1                                  | <i>Athyrium felix-femina</i>    | 3  | <i>Dryopteris expansa</i>       | 5  | <i>Woodsia glabella</i>          |
| 2                                  | <i>Dryopteris dilatata</i>      | 4  | <i>Gymnocarpium dryopteris</i>  | 6  | unknown fern                     |
| Non-Vascular—Lichen                |                                 |    |                                 |    |                                  |
| 1                                  | <i>Bryoria fuscenssens</i>      | 18 | <i>Cladonia deformis</i>        | 35 | <i>Nephroma</i> species          |
| 2                                  | <i>Cetraria cucullata</i>       | 19 | <i>Cladonia ecmocyna</i>        | 36 | <i>Pannaria pezizoides</i>       |
| 3                                  | <i>Cetraria deliseii</i>        | 20 | <i>Cladonia gracilis</i>        | 37 | <i>Parmeliopsis ambigua</i>      |
| 4                                  | <i>Cetraria islandica</i>       | 21 | <i>Cladina mitis</i>            | 38 | <i>Parmelia sulcata</i>          |
| 5                                  | <i>Cetraria nivalis</i>         | 22 | <i>Cladonia multiformis</i>     | 39 | <i>Peltigera aphthosa</i>        |
| 6                                  | <i>Cetraria pinastri</i>        | 23 | <i>Cladina rangiferina</i>      | 40 | <i>Peltigera canina</i>          |
| 7                                  | <i>Cetraia tilesii</i>          | 24 | <i>Cladonia squamosa</i>        | 41 | <i>Peltigera malacea</i>         |
| 8                                  | <i>Cirriphllum cirrosum</i>     | 25 | <i>Cladina stellarus</i>        | 42 | <i>Peltigera neopolydactyla</i>  |
| 9                                  | <i>Cladonia bellidiflora</i>    | 26 | <i>Cladonia uncialis</i>        | 43 | <i>Peltigera polydactyla</i>     |
| 10                                 | <i>Cladonia botrytes</i>        | 27 | <i>Dactylina arctica</i>        | 44 | <i>Peltigera venosa</i>          |
| 11                                 | <i>Cladonia cariosa</i>         | 28 | <i>Evernia mesomorpha</i>       | 45 | <i>Platismatia glauca</i>        |
| 12                                 | <i>Cladonia cenotea</i>         | 29 | <i>Hypogymnia physodes</i>      | 46 | <i>Rhytidium rugosum</i>         |
| 13                                 | <i>Cladonia chlorophaea</i>     | 30 | <i>Lobaria linita</i>           | 47 | <i>Stereocaulon alpinum</i>      |
| 14                                 | <i>Cladonia coccifera</i>       | 31 | <i>Lobaria pulmonaria</i>       | 48 | <i>Stereocaulon</i> species      |
| 15                                 | <i>Cladonia coniocraea</i>      | 32 | <i>Masonhalea richardsonii</i>  | 49 | <i>Usnia subfloridana</i>        |
| 16                                 | <i>Cladonia cornuta</i>         | 33 | <i>Nephroma arcticum</i>        | 50 | unknown lichen                   |
| 17                                 | <i>Cladonia crispata</i>        | 34 | <i>Nephroma expallidum</i>      |    |                                  |
| Non-Vascular—Moss                  |                                 |    |                                 |    |                                  |
| 1                                  | <i>Aulacomnium palustre</i>     | 9  | <i>Hylocomium splendens</i>     | 17 | <i>Ptilium crista-castrensis</i> |
| 2                                  | <i>Aulacomnium turgidum</i>     | 10 | <i>Hypnum subimponens</i>       | 18 | <i>Rhizomnium glabrescens</i>    |
| 3                                  | <i>Brachythecium salebrosum</i> | 11 | <i>Philonotis fontana</i>       | 19 | <i>Sphagnum</i> species          |
| 4                                  | <i>Campylium stellatum</i>      | 12 | <i>Plagiomnium medium</i>       | 20 | <i>Splachnum luteum</i>          |
| 5                                  | <i>Climacium dendroides</i>     | 13 | <i>Pleurozium schreberi</i>     | 21 | <i>Thuidium abietinum</i>        |
| 6                                  | <i>Dicranum</i> species         | 14 | <i>Polytrichum commune</i>      | 22 | <i>Timmia ausstriaca</i>         |
| 7                                  | <i>Drepanocladus uncinatus</i>  | 15 | <i>Polytrichum juniperinum</i>  | 23 | <i>Tomenthypnum nitens</i>       |
| 8                                  | <i>Hedwigia ciliata</i>         | 16 | <i>Polytrichum piliferum</i>    | 24 | unknown moss                     |
| Non-Vascular—Liverwort             |                                 |    |                                 |    |                                  |
| 1                                  | <i>Lepidozia reptans</i>        | 2  | <i>Lophozia ventricosa</i>      | 3  | <i>Marchantia polymorpha</i>     |

1

2

1 **Table S2 | Definition, unit, and summary statistics of the variables used in this study.**

| <b>Variable</b>               | <b>Definition</b>                                                                                                   | <b>Unit</b>                                              | <b>Mean</b> | <b>Std.</b> | <b>Min.</b> | <b>Max.</b> |
|-------------------------------|---------------------------------------------------------------------------------------------------------------------|----------------------------------------------------------|-------------|-------------|-------------|-------------|
| <b>Response variables</b>     |                                                                                                                     |                                                          |             |             |             |             |
| $ANPP_{ijk}$                  | Aboveground net primary productivity of the $k$ th tree of plot $j$ and species $i$ (individual-level ANPP)         | $10^3 \text{g} \cdot \text{ha}^{-1} \cdot \text{y}^{-1}$ | 31.84       | 49.81       | -1811.58    | 1583.14     |
| <b>Biodiversity measures</b>  |                                                                                                                     |                                                          |             |             |             |             |
| $N_j$                         | Richness of all the plant species of plot $j$                                                                       |                                                          | 18.93       | 4.90        | 1.00        | 39.00       |
| $H_j$                         | Shannon index                                                                                                       |                                                          | 0.56        | 0.32        | 0.00        | 1.31        |
| $D_j$                         | Simpson index/HHI                                                                                                   |                                                          | 0.30        | 0.20        | 0.00        | 0.69        |
| <b>Control variables</b>      |                                                                                                                     |                                                          |             |             |             |             |
| $V$                           | Total AGB biomass at the previous inventory (5 years before current inventory)                                      | $10^3 \text{g} \cdot \text{ha}^{-1}$                     | 103014.48   | 48421.98    | 3330.30     | 343300.47   |
| $E$                           | Plot elevation obtained from GPS unit                                                                               | m                                                        | 110.15      | 68.48       | 5.37        | 292.10      |
| $L$                           | Percentage slope of a plot                                                                                          |                                                          | 11.50       | 14.37       | 0.00        | 77.00       |
| $O$                           | Thickness of all surface organic horizons                                                                           | cm                                                       | 11.83       | 10.69       | 1.27        | 109.22      |
| $SN$                          | Number of snags                                                                                                     |                                                          | 18.72       | 19.79       | 0.00        | 119.00      |
| $P$                           | Number of <i>Picea glauca</i> individuals in comparative relationship to the total number of trees on a plot        |                                                          | 0.37        | 0.34        | 0.00        | 1.00        |
| <b>Temporal variables</b>     |                                                                                                                     |                                                          |             |             |             |             |
| $T_1$                         | First time indicator that takes the value 1 if current inventory is the <i>third</i> inventory and 0 if otherwise   |                                                          | 0.33        | 0.47        | 0.00        | 1.00        |
| $T_2$                         | Second time indicator that takes the value 1 if current inventory is the <i>fourth</i> inventory and 0 if otherwise |                                                          | 0.08        | 0.28        | 0.00        | 1.00        |
| <b>Geographic coordinates</b> |                                                                                                                     |                                                          |             |             |             |             |
| $\lambda$                     | Easting of UTM coordinates                                                                                          | $10^6 \text{m}$                                          | 0.52        | 0.10        | 0.34        | 0.66        |
| $\varphi$                     | Northing of UTM coordinates                                                                                         | $10^6 \text{m}$                                          | 6.94        | 0.17        | 6.66        | 7.24        |

2

1 **Table S3 | Estimates and goodness-of-fit of the spatio-temporal model supporting N-E.**  
 2 Initial explanatory variables were selected with HP, and parameters were estimated using GLS.  
 3 Biodiversity variables and their significance levels were in shade.

| Shannon Index         |         |                    | Simpson Index/HHI     |         |                    |
|-----------------------|---------|--------------------|-----------------------|---------|--------------------|
| <i>Var</i>            | Coef    | 95% C.I.           | <i>Var</i>            | Coef    | 95% C.I.           |
| <i>const</i>          | 12.34   | (11.66, 13.02)     | <i>const</i>          | 13.25   | (12.63, 13.86)     |
| <i>H</i>              | 10.51   | (8.80, 12.22)      | <i>D</i>              | 16.10   | (13.11, 19.09)     |
| <i>H</i> <sup>2</sup> | -3.87   | (-5.32, -2.42)     | <i>D</i> <sup>2</sup> | -8.27   | (-13.06, -3.47)    |
| <i>V</i>              | 0.00015 | (0.00015, 0.00016) | <i>V</i>              | 0.00015 | (0.00014, 0.00015) |
| <i>SN</i>             | -0.20   | (-0.21, -0.19)     | <i>SN</i>             | -0.20   | (-0.21, -0.20)     |
| <i>P</i>              | 15.19   | (14.64, 15.73)     | <i>P</i>              | 15.05   | (14.51, 15.59)     |
| <i>T</i> <sub>1</sub> | -2.05   | (-2.40, -1.71)     | <i>T</i> <sub>1</sub> | -2.06   | (-2.41, -1.72)     |
| <i>T</i> <sub>2</sub> | -5.63   | (-6.15, -5.10)     | <i>T</i> <sub>2</sub> | -5.69   | (-6.21, -5.17)     |
| <i>AIC</i>            | 4259.10 |                    | <i>AIC</i>            | 4260.24 |                    |
| <i>BIC</i>            | 4358.65 |                    | <i>BIC</i>            | 4359.79 |                    |
| <i>n</i>              | 470513  |                    | <i>n</i>              | 470513  |                    |

4 *const*: constant  
 5 AIC: Akaike information criterion  
 6 BIC: Bayesian information criterion  
 7 *n*: number of observations that is used in the bootstrap simulation  
 8  
 9  
 10
